# Supplementary material
Source: PubMed Central journal article supplement (PMC3719528)
Supplement: AEM.00620-13_zam999104572so1.pdf [file AEM.00620-13_zam999104572so1.pdf]

TABLE S1. ORF's and genetic features of *L. helveticus* ΦAQ113

| ORF | Start | Stop  | Size (aa) | pI    | Putative RBS and start codon<br>AGGAGGACAGCTATG* | Putative Predicted Function              | Organism matched                              | Identity (%) | E-value   |
|-----|-------|-------|-----------|-------|--------------------------------------------------|------------------------------------------|-----------------------------------------------|--------------|-----------|
| 1   | 1     | 489   | 162       | 9.52  | AGCATCAAAAGGCTGTAAAAATG                          | Phage terminase small subunit            | <i>Lactobacillus vaginalis</i> ATCC 49540     | 66           | 6,00E-12  |
| 2   | 600   | 1232  | 210       | 10.03 | CATAGAAAGGCTATGATCACATG                          | HNH endonuclease                         | <i>Bacteroides</i> sp. 3_1_33FAA              | 46,4         | 4,00E-54  |
| 3   | 1365  | 1775  | 136       | 9.10  | TTGAAAGAAGGTGATTAAGATTG                          | Possible phage terminase large subunit B | <i>Lactobacillus vaginalis</i> ATCC 49540     | 82           | 7,00E-83  |
| 4   | 1929  | 2528  | 200       | 5.09  | AAGCTCAAACACCTTCAGGAATG                          | Putative phage terminase large subunit B | <i>Lactobacillus gasseri</i> phage KC5a       | 80,4         | 6,00E-120 |
| 5   | 2479  | 3615  | 378       | 4.85  | GAGAAACGCGAAAGGAGGCTTTG                          | Portal protein                           | <i>Lactobacillus gasseri</i> ATCC 33323       | 71           | 2,00E-111 |
| 6   | 3651  | 3986  | 111       | 9.05  | AAGAAGTCTAGTGATTAATTATG                          | Minor head protein                       | <i>Lactobacillus johnsonii</i> prophage Lj771 | 54           | 7,00E-27  |
| 7   | 3997  | 4185  | 62        | 9.22  | CGGAATATGACCTTTGAACAATG                          | Unknown protein                          |                                               |              |           |
| 8   | 4294  | 4833  | 179       | 5.01  | AAAAGGTAAGGAGAATTTATATG                          | Phage minor structural protein GP20      | <i>Lactobacillus gasseri</i> ATCC 33323       | 58,8         | 1,00E-70  |
| 9   | 4848  | 5924  | 358       | 5.01  | AAATAGAGGAGATTTATTAATG                           | Putative phage major capsid protein      | <i>Lactobacillus gasseri</i> phageKC5a        | 71           | 2,00E-178 |
| 10  | 5942  | 6313  | 123       | 4.36  | TAGCATAAGGTGGTGATTGGATG                          | Head-tail connector protein gp15         | Bacteriophage SPP1                            | 47,3         | 2,36E-08  |
| 11  | 6310  | 6492  | 60        | 9.85  | AACTTCAGGAGATTACCAGAATG                          | Hypothetical protein LI771_035           | <i>Lactobacillus johnsonii</i> prophage Lj771 | 59,3         | 8,00E-15  |
| 13  | 6835  | 7260  | 141       | 4.54  | GCTTTTAGGAATTTACTATCATG                          | Hypothetical protein LGAS_614            | <i>Lactobacillus gasseri</i> ATCC 33323       | 38           | 4,00E-24  |
| 14  | 7229  | 7432  | 67        | 4.83  | ACAAAAGGAGCTTAGATTTAAATG                         | Hypothetical protein                     | <i>Lactobacillus gasseri</i> phage KC5a       | 37           | 4,00E-03  |
| 15  | 7436  | 8896  | 486       | 5.17  | TTAAAGGAGGTATGTAATAAATG                          | Putative phage sheath tail protein       | <i>Lactobacillus gasseri</i> JV-V03           | 50           | 2,00E-146 |
| 16  | 8908  | 9381  | 157       | 4.88  | GTTAGATAGGAGGTAAATAAATG                          | Sheat tail protein                       | <i>Lactobacillus gasseri</i> ATCC 33323       | 60,6         | 1,00E-68  |
| 17  | 9393  | 9809  | 138       | 4.76  | ATTCAGTAAGGAGAAAATAAATG                          | Phage XkdN-like protein                  | <i>Lactobacillus gasseri</i> 224-1            | 46           | 2,00E-32  |
| 19  | 10058 | 12304 | 748       | 10.08 | AACTAGAAAAGGAGTAATATATG                          | Tape measure protein                     | <i>Lactobacillus gasseri</i> 224-1            | 60,8         | 3,00E-140 |
| 21  | 12421 | 12894 | 157       | 5.76  | GTAGTGCATTAATCNCCTGTG                            | Minor tail protein gp26-like             | <i>Lactobacillus gasseri</i> ATCC 33323       | 31           | 3,00E-17  |
| 22  | 12901 | 13602 | 233       | 9.84  | AATCATTAAGTTAGGAAGCGATG                          | LysM-like protein                        | <i>Lactobacillus gasseri</i> phage KC5a       | 48           | 3,00E-62  |
| 23  | 13595 | 14662 | 355       | 9.58  | AATGAGCGAGGTTAAAAGATATG                          | Phage late control gene D protein GPD    | <i>Lactobacillus gasseri</i> ATCC 33323       | 44           | 2,00E-93  |
| 24  | 14635 | 14979 | 114       | 7.93  | GTAAACGGCTCTATGAGTTAATG                          | Hypothetical protein LI771_045           | <i>Lactobacillus johnsonii</i> prophage Lj771 | 50,4         | 2,00E-35  |
| 25  | 15005 | 15418 | 137       | 3.85  | AGGATAGGTGAAGACGGTTTTG                           | Phage protein DUF2634 superfamily        | <i>Lactobacillus gasseri</i> JV-V03           | 57           | 5,00E-42  |
| 26  | 15408 | 16553 | 381       | 4.56  | AAGTAGGTGGATATAGTAGATG                           | Baseplate J-like protein                 | <i>Lactobacillus gasseri</i> 224-1            | 62,7         | 1,00E-179 |
| 27  | 16546 | 17115 | 189       | 4.83  | TTTAGGTGAGGTGACTATAAATG                          | Hypothetical protein LI771_048           | <i>Lactobacillus johnsonii</i> prophage Lj771 | 47,8         | 2,00E-52  |
| 28  | 17301 | 19031 | 576       | 5.29  | TGTAAGAGGTGATTTTTAAAAGT                          | Hypothetical protein HMPREF0891_0013     | <i>Lactobacillus crispatus</i> 214-1          | 51           | 5,00E-44  |
| 29  | 19047 | 19430 | 127       | 5.81  | AATAGAAAGGGGGCGAACACATG                          | Hypothetical protein HMPREF0891_0014     | <i>Lactobacillus crispatus</i> 214-1          | 40,2         | 3,00E-21  |
| 30  | 19496 | 20092 | 198       | 5.07  | AATAGAAAGGAGCCAATAAATG                           | Phage related protein                    | <i>Lactobacillus amylovorus</i> GRL 1112      | 51,6         | 4,00E-49  |
| 31  | 20106 | 20294 | 62        | 4.46  | GCAATAAGGAGGATTAGGCTATG                          | Hypothetical protein LA2_05900           | <i>Lactobacillus amylovorus</i> GRL 1112      | 88,5         | 3,00E-31  |

|    |       |       |     |       |                                   |                                                  |                                                 |      |           |
|----|-------|-------|-----|-------|-----------------------------------|--------------------------------------------------|-------------------------------------------------|------|-----------|
| 32 | 20687 | 20896 | 69  | 6.23  | AGAAA <u>GGAG</u> CTGATACACTTATG  | Predicted protein                                | <i>Lactobacillus crispatus</i> MV-3A-US         | 76,8 | 1,00E-32  |
| 33 | 20880 | 21107 | 75  | 5.07  | ACGAA <u>AGGAG</u> TAAATAACAATG   | Predicted protein                                | <i>Lactobacillus crispatus</i> MV-3A-US         | 61,8 | 2,00E-23  |
| 34 | 21116 | 21505 | 129 | 4.83  | GTGGGTGACTAGTCGTGCAATG            | Predicted protein                                | <i>Lactobacillus crispatus</i> MV-3A-US         | 40   | 7,00E-18  |
| 35 | 21514 | 22689 | 391 | 9.72  | ATGCCAAAAATGGCTAAAACATG           | Endolysin                                        | <i>Lactobacillus helveticus</i> phage f-0303    | 88   | 0.0       |
| 36 | 22909 | 23610 | 233 | 4.64  | AGAAAT <u>AGGGGG</u> AAAAGAAAATG  | Unknown protein                                  |                                                 |      |           |
| 37 | 23610 | 23939 | 109 | 9.8   | TATGAATATGAAGAAATATAATG           | Unknown protein                                  |                                                 |      |           |
| 38 | 23920 | 25089 | 389 | 9.5   | AAAAAT <u>TGGAGC</u> GTCTGCGAGTG  | Hypothetical protein lmo1311                     | <i>Listeria monocytogenes</i> EGD-e             | 47,3 | 4,00E-118 |
| 39 | 25079 | 26380 | 433 | 9.24  | CAATAGAA <u>AGGAG</u> TTTGCAAATG  | Phosphoadenosine phosphosulfate reductase        | <i>Akkermansia muciniphila</i> ATCC BAA-835     | 51   | 9,00E-160 |
| 40 | 26286 | 26876 | 196 | 9.06  | AGAAAAG <u>AGGAG</u> AAAAGCAATTG  | Co-activator of prophage gene expression         | <i>Staphylococcus pseudintermedius</i> HKU10-03 | 81,9 | 3,00E-101 |
| 43 | 27531 | 27746 | 71  | 10.14 | TATAGTA <u>AGGCG</u> TGGAAATAATG  | Cro-like protein phage associated                | <i>Lactobacillus</i> phage Sal2                 | 52   | 3,00E-12  |
| 44 | 27851 | 28639 | 262 | 9.21  | AAGTCGAAAGGAAAAATTAATG            | Prophage antirepressor                           | <i>Lactobacillus jensenii</i> 269-3             | 80,7 | 2,00E-152 |
| 45 | 28795 | 28974 | 59  | 6.27  | TTAGACAAAT <u>AGGAG</u> AAAAAATG  | Hypothetical protein LA2_07830                   | <i>Lactobacillus amylovorus</i> GRL 1112        | 64,4 | 1,00E-19  |
| 46 | 28988 | 29149 | 53  | 9.57  | GTACTA <u>AGGAG</u> GATTCAAGATG   | Hypothetical protein LA2_07825                   | <i>Lactobacillus amylovorus</i> GRL 1112        | 56,6 | 2,00E-15  |
| 47 | 29195 | 29725 | 176 | 9.56  | T <u>AGGAG</u> ATTATAAACCAAAAATG  | HNH endonuclease                                 | <i>Lactobacillus rhamnosus</i> Lc-Nu            | 42,3 | 2,00E-34  |
| 49 | 29730 | 30101 | 123 | 3.94  | AGATTGTG <u>AGGC</u> ATAACACAATG  | Prophage protein                                 | <i>Lactobacillus crispatus</i> CTV-05           | 74,8 | 1,00E-60  |
| 50 | 30112 | 30399 | 95  | 4.97  | TGGAAAAGT <u>AGGTT</u> CTTAATAATG | Predicted protein                                | <i>Lactobacillus crispatus</i> MV-3A-US         | 29   | 5,00E-05  |
| 51 | 30399 | 31043 | 214 | 7.78  | CAGAAAT <u>TGGAG</u> TAGAGACTAATG | ERF Recombinase                                  | <i>Lactococcus lactis</i> phage P335            | 57   | 1,00E-35  |
| 52 | 31054 | 31890 | 278 | 9.03  | AGCTATTTAGAGGGAAAACTATG           | DNA replication protein                          | <i>Lactobacillus johnsonii</i> prophage Lj771   | 47   | 6,00E-67  |
| 53 | 31925 | 32725 | 266 | 9.24  | TGTCAAAAGCAAAGCCAATCATG           | DNA replication protein                          | <i>Lactobacillus crispatus</i> CTV-05           | 45,9 | 5,00E-83  |
| 54 | 32727 | 33083 | 118 | 7.8   | TACGGACAAG <u>AGGT</u> ACTAATATG  | Putative transcriptional regulator               | <i>Lactobacillus gasseri</i> phage KC5a         | 73   | 1,00E-26  |
| 56 | 33516 | 33941 | 141 | 6.27  | ACA <u>AGT</u> AGATATTGCAGATGATG  | Single-strand DNA binding protein                | Temperate phage phiNIH1.1                       | 55   | 9,00E-48  |
| 57 | 34001 | 34471 | 156 | 8.90  | TTTTGATTTCTTAACAATAATG            | Unknown protein                                  |                                                 |      |           |
| 58 | 34490 | 34663 | 57  | 5.41  | AATTATTCG <u>AGGT</u> GATATAGATG  | Unknown protein                                  |                                                 |      |           |
| 59 | 34679 | 34969 | 96  | 5.6   | ATTAAGCAATACAGTGTGCATG            | Hypothetical protein HMPREF0506_1653             | <i>Lactobacillus crispatus</i> JV-V01           | 55   | 3,00E-31  |
| 60 | 34941 | 35324 | 127 | 7.79  | GATCCTTGCTCGTAGAATTCATG           | Phage protein - Restriction nuclease superfamily | <i>Lactobacillus gasseri</i> JV-V03             | 83,6 | 5,00E-64  |
| 61 | 35431 | 35574 | 47  | 5.08  | CGTGGGAGA <u>AGGT</u> GTTTAGATG   | Predicted protein                                | <i>Lactobacillus crispatus</i> MV-3A-US         | 61,9 | 3,00E-10  |
| 63 | 35692 | 36132 | 146 | 5.93  | AAAAATTTA <u>TGGAG</u> TGATTATGTG | Phage transcriptional regulator, ArpU family     | <i>Lactobacillus gasseri</i> JV-V03             | 38   | 7,00E-26  |
| 62 | 36372 | 36521 | 49  | 9.95  | TTGATAGGAATAAAAAAATCATG           | Hypothetical protein LA2_07740                   | <i>Lactobacillus amylovorus</i> GRL 1112        | 63,6 | 1,00E-11  |

\* The sequence shown includes the immediate upstream 20 nucleotides of the putative start codon and the putative RBS sequences found with RBSfinder (Delcher et al; 1999). The nucleotides complementary to the 3' end of the 16S rRNA of *L.delbrückii* (3'-.....; Mikkonen et al, 1994).

A.L. Delcher, D. Harmon, S. Kasif, O. White, and S.L. Salzberg. Improved Microbial Gene Identification with Glimmer. *Nucleic Acids Research*, 27 (1999), 4636-4641.
