# Supplementary material
Source: PubMed Central journal article supplement (PMC3719528)
Supplement: AEM.00620-13_zam999104572so2.pdf [file AEM.00620-13_zam999104572so2.pdf]

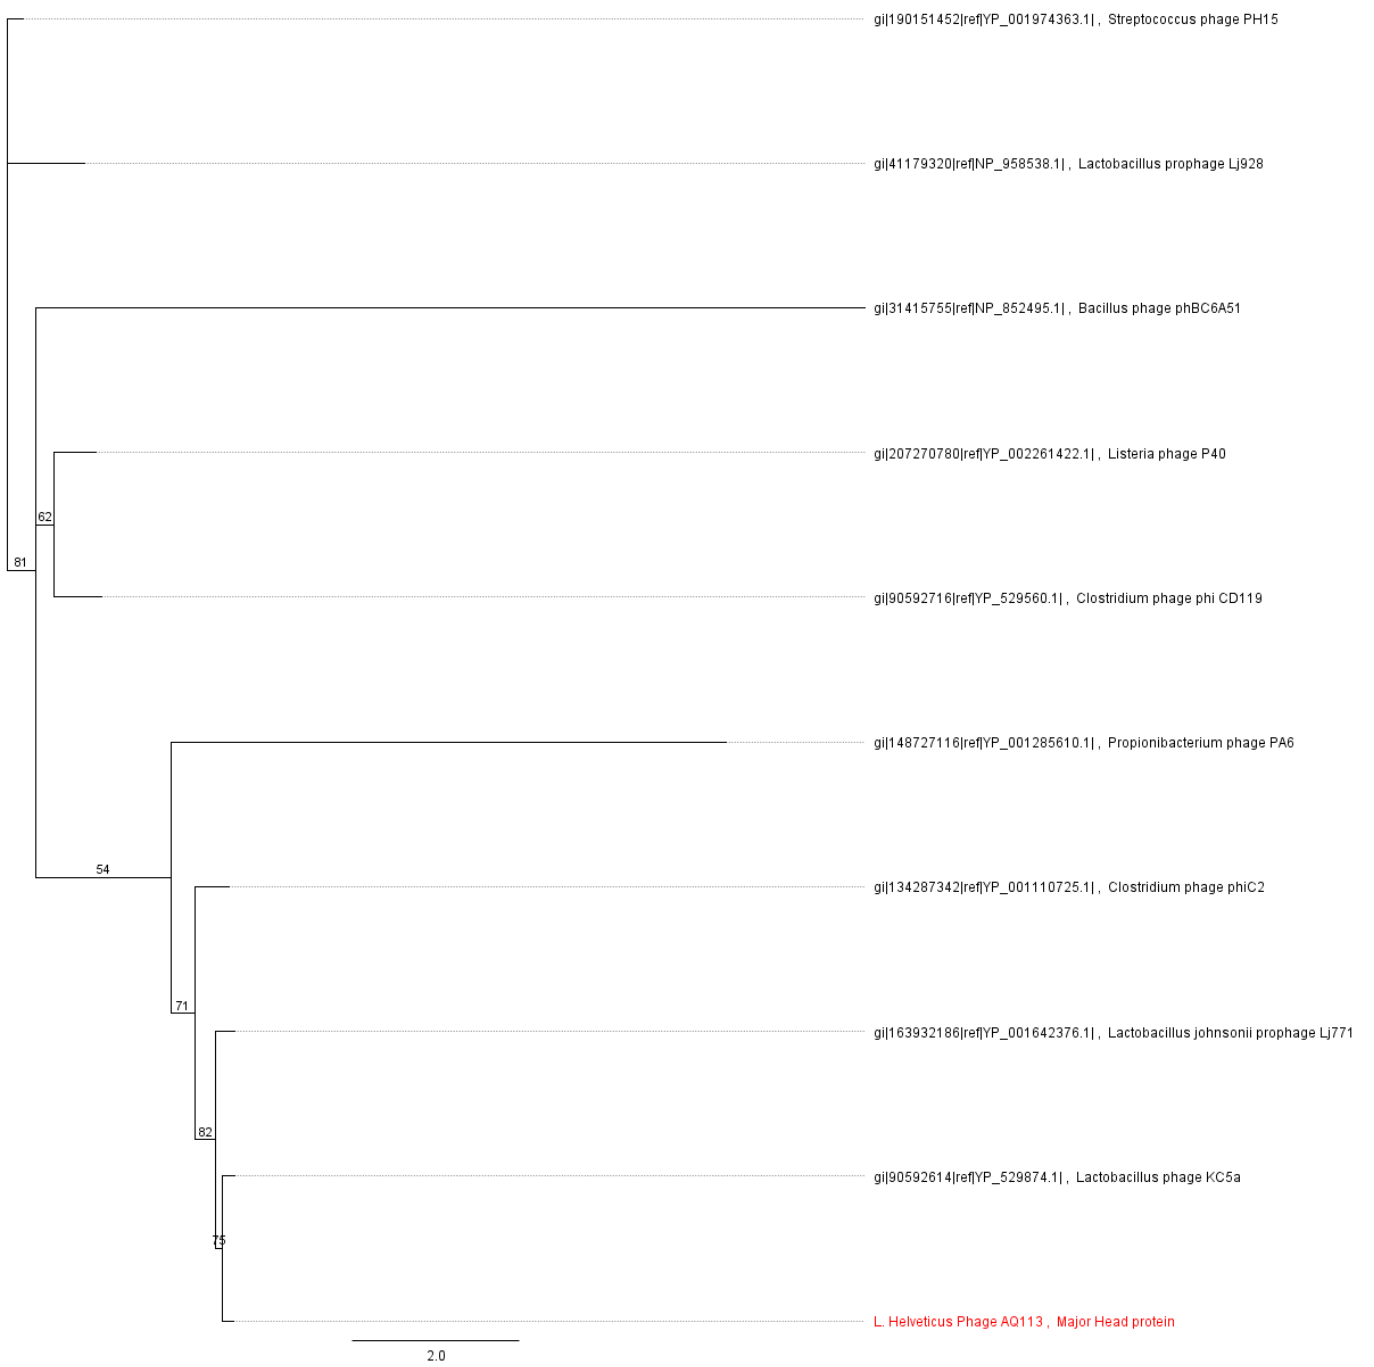

A

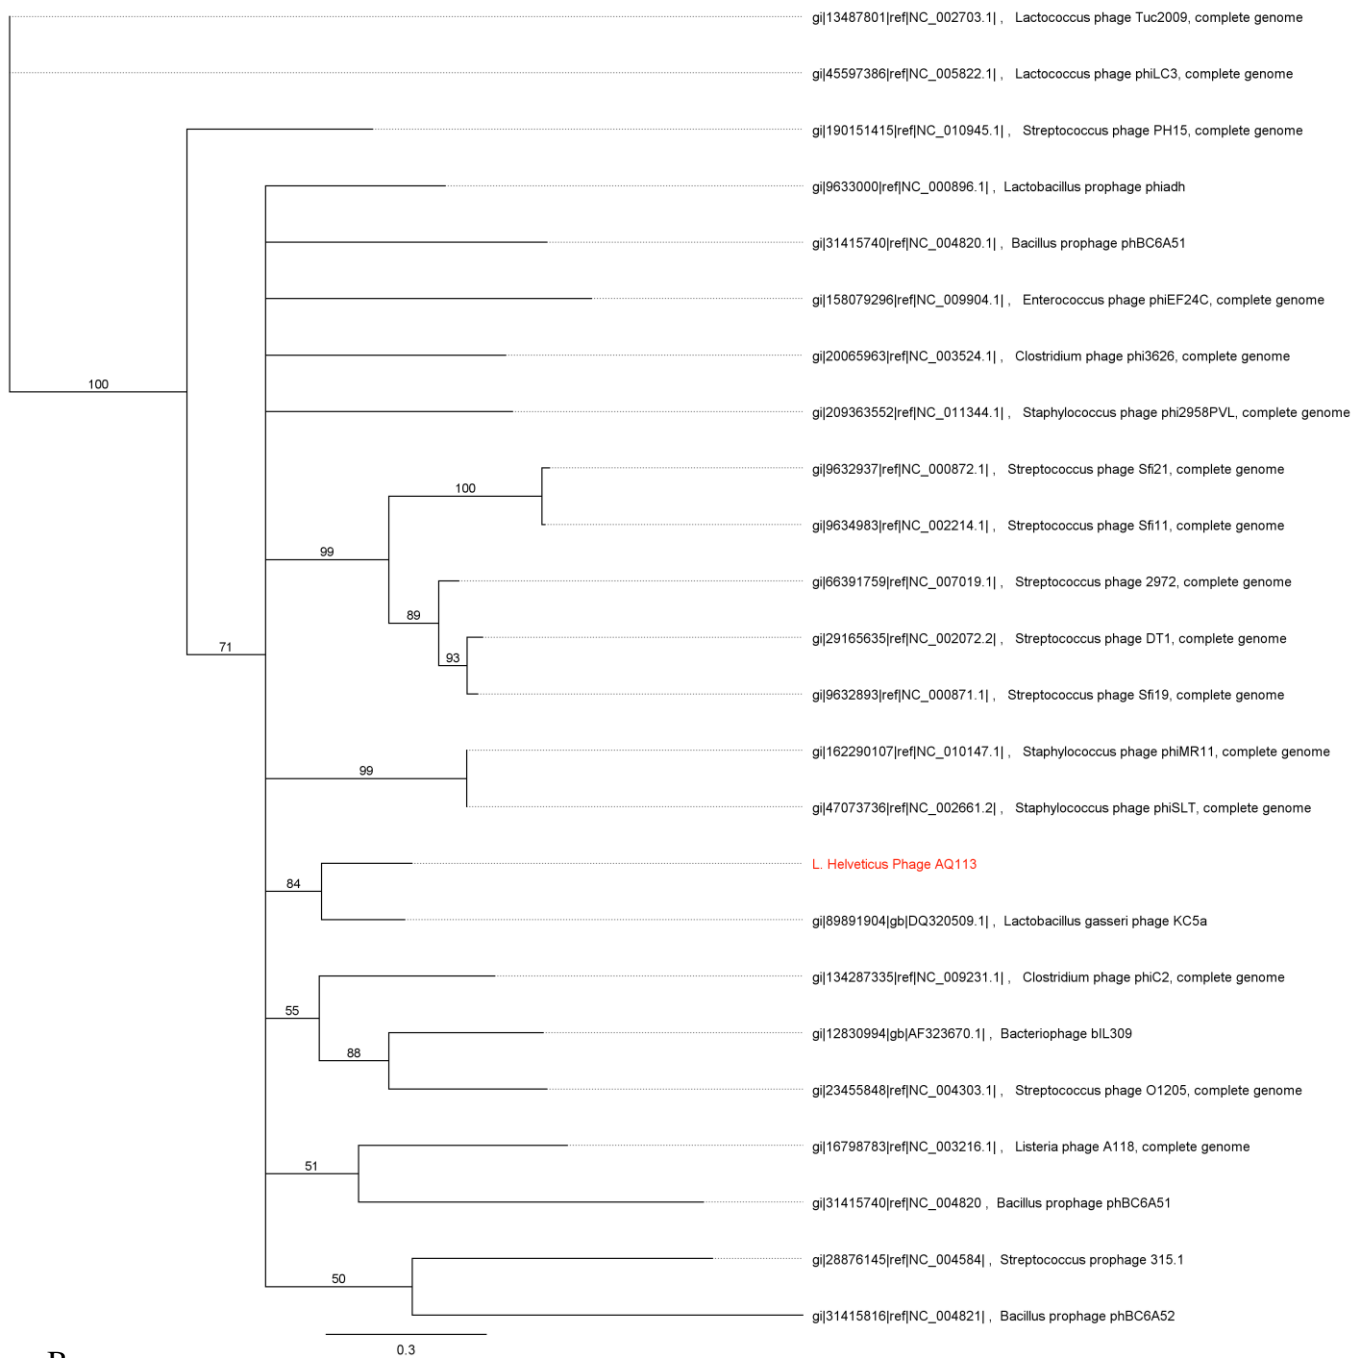

B

FIG. S1. Dendrograms of bacteriophage proteins from NCBI database that showed significant similarity to the major head protein (A) and the transcriptional regulator protein (B) of the  $\Phi$ AQ113. The phylogenetic trees were derived by alignment using Clustalw2 and were obtained using Jukes-Cantor algorithm for evaluating genetic distance and neighbour joining for clustering.
